# Supplementary material for: Smoking cessation and relapse-prevention interventions tailored for expectant and new fathers: protocol of a systematic review and network meta-analysis
Source: HighWire-hosted journal article supplement (doi:10.1136/bmjopen-2023-071745), 2023-10-01
Supplement: bmjopen-2023-071745supp002_data_supplement.pdf [file bmjopen-2023-071745supp002_data_supplement.pdf]

## Supplementary Material 2

### Title

**Protocol of a systematic review and network meta-analysis for the intervention of smoking cessation and relapse prevention tailored for expectant and new fathers**

### List

**Search strategy for the following; Intervention of smoking cessation and relapse prevention tailored for expectant and new fathers.**

- (1) Search strategy in PubMed**
- (2) Search strategy in Embase**
- (3) Search strategy in PsycInfo**
- (4) Search strategy in CENTRAL**
- (5) Search strategy in ScienceDirect**
- (6) Search strategy in CINAHL**
- (7) Search strategy in British nursing index**
- (8) Search strategy in CNKI**
- (9) Search strategy in Wanfang**
- (10) Search strategy in Clinical Trials.gov**

### Databases

- PubMed
- Embase
- PsycInfo
- The Cochrane Central Register of Controlled Trials (CENTRAL) (The Cochrane Library)
- ScienceDirect
- Cumulative index to nursing Allied Health Literature (CINAHL)
- British nursing index
- China national knowledge infrastructure (CNKI)
- Wanfang
- Clinical Trials.gov

### (1) PubMed:

((expectant father\*[Title/Abstract]) OR (father\*[Title/Abstract]) OR (new father\*[Title/Abstract]) OR (smoking husband\*[Title/Abstract]) OR (smoking partner\*[Title/Abstract]) OR (nonsmoking mother\*[Title/Abstract]) OR (male partner\*[Title/Abstract]) OR (family based[Title/Abstract]) OR (child\*[Title/Abstract])) OR (infant\*[Title/Abstract]) OR (newborn\*[Title/Abstract])) AND ((smoking cessation[Title/Abstract]) OR (quit smoking[Title/Abstract]) OR (cigarette\*[Title/Abstract]) OR (smoking relapse[Title/Abstract]) OR (tobacco\*[Title/Abstract]) OR (secondhand smoke[Title/Abstract]) OR (cotinine[Title/Abstract]) OR (stop smoking[Title/Abstract]) OR (quitting method[Title/Abstract])) AND ((randomized controlled trial[Publication Type]) OR (controlled clinical trial[Publication Type]) OR (randomized[Title/Abstract]) OR

(placebo[Title/Abstract]) OR (randomly[Title/Abstract]) OR (trial[Title/Abstract]) OR (groups[Title/Abstract]))

(2) Embase

('expectant father':ti,ab,kw OR 'father':ti,ab,kw OR fatherhood:ti,ab,kw OR parents:ti,ab,kw OR 'new father':ti,ab,kw OR 'smoking husband':ti,ab,kw OR 'smoking partner':ti,ab,kw OR 'nonsmoking mother':ti,ab,kw OR 'male partner':ti,ab,kw OR 'family based':ti,ab,kw OR 'childbirth':ti,ab,kw OR 'infant':ti,ab,kw OR 'newborn':ti,ab,kw) AND ('smoking cessation':ti,ab,kw OR 'smoking cessation intervention':ti,ab,kw OR 'quit smoking':ti,ab,kw OR 'stop smoking':ti,ab,kw OR 'smoking relapse':ti,ab,kw OR 'tobacco':ti,ab,kw OR 'cigarette smoking':ti,ab,kw OR cigarette:ti,ab,kw OR smoking:ti,ab,kw OR nicotine:ti,ab,kw) AND ('randomized controlled trial':ti,ab,kw OR 'controlled clinical trial':ti,ab,kw OR 'randomized':ti,ab,kw OR 'placebo':ti,ab,kw OR 'randomly':ti,ab,kw OR 'groups':ti,ab,kw)

(3) APA PsycInfo

TX ("expectant father" OR "father" OR "fatherhood" OR "new father" OR "smoking husband" OR "smoking partner" OR "nonsmoking mother" OR "male partner" OR "family based" OR "childbirth" OR "infant" OR "newborn") AND ("smoking cessation" OR "smoking cessation intervention" OR "quit smoking" OR "stop smoking" OR "smoking relapse" OR "tobacco" OR "cigarette smoking" OR cigarette OR smoking OR nicotine) AND ("randomized controlled trial" OR "controlled clinical trial" OR "randomized" OR "placebo" OR "randomly" OR "groups" )

(4) CENTRAL

('expectant father'):ti,ab,kw OR ('father' OR 'nonsmoking mother' OR 'male partner' OR 'family based' OR 'childbirth'):ti,ab,kw OR ('new father' OR 'infant' OR 'newborn'):ti,ab,kw OR ('smoking husband'):ti,ab,kw OR ('smoking partner'):ti,ab,kw AND ('smoking cessation'):ti,ab,kw OR ('quit smoking'):ti,ab,kw OR ('cigarette' OR 'tobacco' OR 'secondhand smoke' OR 'cotinine'):ti,ab,kw OR ('smoking relapse'):ti,ab,kw AND ('stop smoking'):ti,ab,kw AND ('randomized controlled trial' OR 'controlled clinical trial' OR 'randomized' OR 'placebo' OR 'randomly' OR 'groups'):ti,ab,kw

(5) ScienceDirect

('expectant father' OR 'new father' OR 'smoking husband' OR 'smoking partner') AND ('smoking cessation' OR 'quit smoking' OR 'smoking relapse')

(6) Cumulative index to nursing Allied Health Literature

subject contains ('expectant father' OR 'father' OR fatherhood OR 'new father' OR 'smoking husband' OR 'smoking partner' OR 'nonsmoking mother' OR 'male partner' OR 'family based' OR 'childbirth' OR 'infant' OR 'newborn') AND subject contains ('smoking cessation' OR 'smoking cessation intervention' OR 'quit smoking' OR 'stop smoking' OR 'smoking relapse' OR 'tobacco' OR 'cigarette

smoking" OR cigarette OR smoking OR nicotine) AND subject contains ("randomized controlled trial" OR "controlled clinical trial" OR "randomized" OR "placebo" OR "randomly" OR "groups")

(7) British nursing index

summary ("expectant father" OR "father" OR fatherhood OR "new father" OR "smoking husband" OR "smoking partner" OR "nonsmoking mother" OR "male partner" OR "family based" OR "childbirth" OR "infant" OR "newborn") AND ("smoking cessation" OR "smoking cessation intervention" OR "quit smoking" OR "stop smoking" OR "smoking relapse" OR "tobacco" OR "cigarette smoking" OR cigarette OR smoking OR nicotine) AND ("randomized controlled trial" OR "controlled clinical trial" OR "randomized" OR "placebo" OR "randomly" OR "groups" )

(8) CNKI (In Chinese)

ti,ky,ab (准妈妈 + 新爸爸 +
